# Supplementary material for: Using the Personalized Advantage Index for Individual Treatment Allocation to Blended Treatment or Treatment as Usual for Depression in Secondary Care
Source: PubMed Central journal article supplement (PMC7073663; doi:10.3390/jcm9020490), 2020-02-11
Supplement: jcm-09-00490-s001.pdf [file jcm-09-00490-s001.pdf]

Running head: PERSONALIZED ADVANTAGE INDEX IN TAU VS BLENDED  
TREATMENT

Appendices

| <b>Appendix 1</b>                                                                                    |          |                         |
|------------------------------------------------------------------------------------------------------|----------|-------------------------|
| <i>BMA results based on the best 30000 models in the TAU condition</i>                               |          |                         |
| Baseline variables                                                                                   | Prob (%) | Posterior mean (SD)     |
| <i>Sociodemographic variables</i>                                                                    |          |                         |
| Denmark                                                                                              | 57.5     | -1.572179<br>(1.682192) |
| High education                                                                                       | 33.4     | -0.498814<br>(0.890317) |
| Middle education                                                                                     | 15.4     | 0.152283<br>(0.525018)  |
| Married                                                                                              | 14.4     | -0.164144<br>(0.532724) |
| Age                                                                                                  | 8.5      | -0.001673<br>(0.010853) |
| Divorced                                                                                             | 7.7      | 0.076725<br>(0.481731)  |
| Female gender                                                                                        | 6.1      | -0.046692<br>(0.289896) |
| Switzerland                                                                                          | 6.1      | -0.041385<br>(0.365273) |
| France                                                                                               | 4.6      | -0.018721<br>(0.245178) |
| Living together                                                                                      | 4.5      | -0.006237<br>(0.229171) |
| Widowed                                                                                              | 3.7      | -0.007041<br>(0.911245) |
| <i>Symptomatology and quality of life</i>                                                            |          |                         |
| pre-treatment PHQ-9                                                                                  | 100      | 0.568373<br>(0.090957)  |
| Therapy preference blended treatment                                                                 | 14.3     | 0.150752<br>(0.513971)  |
| Therapy preference TAU                                                                               | 7.9      | -0.051866<br>(0.329026) |
| Dysthymia                                                                                            | 7.7      | -0.090115<br>(0.555429) |
| Melancholic                                                                                          | 7.2      | -0.020811<br>(0.256394) |
| Recurrent depression                                                                                 | 7.2      | -0.041963<br>(0.275208) |
| Anxiety disorder                                                                                     | 7        | 0.045272<br>(0.281162)  |
| Antidepressant medication                                                                            | 6.6      | -0.033555<br>(0.262399) |
| EQ-5D                                                                                                | 3.4      | 0.019908<br>(0.404468)  |
| <i>Healthcare utilization</i>                                                                        |          |                         |
| “How many days did you use outpatient psychotherapeutic services in addition to your psychotherapy?” | 94.5     | -8.179901<br>(3.765576) |
| “How many times did you consult a general practitioner?”                                             | 63.5     | -0.043966<br>(0.120152) |

PERSONALIZED ADVANTAGE INDEX IN TAU VS BLENDED TREATMENT

|                                                                                               |      |                         |
|-----------------------------------------------------------------------------------------------|------|-------------------------|
| “How many days did you spend in a day-time treatment program in a psychiatric hospital?”      | 50.5 | 3.533107<br>(4.372049)  |
| “How many times did you consult a professional from a clinic for alcohol or drugs?”           | 37.3 | -5.172186<br>(8.222200) |
| “How many times did you consult a psychologist?”                                              | 30.4 | 0.083479<br>(0.163982)  |
| “How many times did you consult a professional from an ambulatory mental health institution?” | 22.1 | -0.044135<br>(0.108400) |
| “How many times did you consult a general practitioner?”                                      | 18.8 | -0.043966<br>(0.120152) |
| “How many times did you consult self-help groups?”                                            | 14.1 | -0.548520<br>(1.867824) |
| “Did health problems oblige you to call in sick from work at any time?”                       | 13.1 | 0.156083<br>(0.592364)  |
| “How many admissions to a psychiatric hospital did you have?”                                 | 8.5  | -0.159826<br>(0.882893) |
| “Do you have a paid job?”                                                                     | 7.8  | -0.055734<br>(0.313400) |
| “How many admissions to a regular hospital did you have?”                                     | 6.8  | -0.059203<br>(0.489230) |
| “How many days did you spend in a day-time treatment program in a regular hospital?”          | 6.3  | 0.089278<br>(0.858992)  |
| “How many times did you consult a psychotherapist?”                                           | 5.8  | -0.001238<br>(0.043720) |
| <i>Patient expectancy</i>                                                                     |      |                         |
| CEQ expectancy                                                                                | 97.5 | -0.267220<br>(0.106232) |
| CEQ credibility                                                                               | 7    | 0.003196<br>(0.032870)  |

**Appendix 2**

*BMA results based on the best 30000 models in the blended treatment condition*

| Baseline variables                        | Prob (%) | Posterior mean (SD)     |
|-------------------------------------------|----------|-------------------------|
| <i>Sociodemographic variables</i>         |          |                         |
| Widowed                                   | 49.7     | 4.251648<br>(5.427225)  |
| Switzerland                               | 35       | -0.743754<br>(1.257351) |
| Married                                   | 32.2     | -0.483091<br>(0.883834) |
| Middle education                          | 31.7     | 0.437548<br>(0.820269)  |
| Divorced                                  | 15.6     | 0.220980<br>(0.720755)  |
| High education                            | 12       | -0.112651<br>(0.486546) |
| Denmark                                   | 10.1     | -0.114511<br>(0.525979) |
| Age                                       | 8.7      | -0.002926<br>(0.014872) |
| France                                    | 8.4      | 0.065530<br>(0.384302)  |
| Living together                           | 7.6      | 0.054765<br>(0.374650)  |
| Female gender                             | 5.1      | 0.024376                |
| <i>Symptomatology and quality of life</i> |          |                         |

PERSONALIZED ADVANTAGE INDEX IN TAU VS BLENDED TREATMENT

|                                                                                                     |       |                         |
|-----------------------------------------------------------------------------------------------------|-------|-------------------------|
| pre-treatment PHQ-9                                                                                 | 100   | 0.368370<br>(0.109324)  |
| EQ-5D                                                                                               | 74.6  | -3.670476<br>(2.893040) |
| Dysthymia                                                                                           | 32.4  | -0.996616<br>(1.809627) |
| Melancholic                                                                                         | 9.6   | 0.091906<br>(0.443747)  |
| Therapy preference TAU                                                                              | 6.9   | 0.018880<br>(0.281612)  |
| Anxiety disorder                                                                                    | 5.5   | -0.996616<br>(1.809627) |
| Recurrent depression                                                                                | 4.8   | -0.008765<br>(0.197716) |
| Therapy preference blended treatment                                                                | 4.8   | -0.013855<br>(0.231330) |
| Antidepressant medication                                                                           | 4.7   | -0.007456<br>(0.208791) |
| <i>Healthcare utilization</i>                                                                       |       |                         |
| “How many admissions to a regular hospital did you have?”                                           | 99.9  | 8.342981<br>(2.151191)  |
| “How many times did you consult self-help groups?”                                                  | 70    | 7.127134<br>(6.193637)  |
| “How many times did you consult a professional from an ambulatory mental health institution?”       | 12.99 | -0.022874<br>(0.090434) |
| “How many times did you consult a psychiatrist?”                                                    | 12.9  | -0.028600<br>(0.114615) |
| “How many times did you consult a general practitioner?”                                            | 7.7   | -0.011800<br>(0.065338) |
| “Did health problems oblige you to call in sick from work at any time?”                             | 6.9   | 0.047023<br>(0.361087)  |
| “How many times did you consult a professional from a clinic for alcohol or drugs?”                 | 6.8   | 0.110948<br>(0.805541)  |
| “How many times did you consult a psychologist?”                                                    | 6.5   | -0.005287<br>(0.054229) |
| “How many days did you spend in a day-time treatment program in a regular hospital?”                | 6.4   | 0.139228<br>(1.344264)  |
| “How many days did you spend in a day-time treatment program in a psychiatric hospital?”            | 5.9   | 0.029929<br>(0.701060)  |
| “How many admissions to a psychiatric hospital did you have?”                                       | 5.7   | -0.006769<br>(0.843517) |
| “How many times did you consult a psychotherapist?”                                                 | 5     | 0.005185<br>(0.053066)  |
| How many days did you use outpatient psychotherapeutic services in addition to your psychotherapy?” | 4.9   | 0.008775<br>(0.774172)  |
| “Do you have a paid job?”                                                                           | 4.9   | -0.003680<br>(0.206993) |
| <i>Patient expectancy</i>                                                                           |       |                         |
| CEQ expectancy                                                                                      | 72.4  | -0.221924<br>(0.170339) |
| CEQ credibility                                                                                     | 43.9  | -0.128043<br>(0.175279) |
